# Supplementary material for: Robust porphyrin catalysts immobilized on biogenous iron oxide for the repetitive conversions of epoxides and CO2 into cyclic carbonates
Source: Royal Society of Chemistry journal article supplement (doi:10.1039/c3gc41055b), 2013-01-01
Supplement: c3gc41055b.pdf [file c3gc41055b.pdf]

## Supplementary Information

### **Robust porphyrin catalysts immobilized on biogenous iron oxide for the repetitive conversions of epoxides and CO<sub>2</sub> into cyclic carbonates**

Tadashi Ema,\* Yuki Miyazaki, Tomoya Taniguchi and Jun Takada\*

*Division of Chemistry and Biotechnology, Graduate School of Natural Science and  
Technology, Okayama University, Tsushima, Okayama 700-8530, Japan*

[1] <sup>1</sup>H and <sup>13</sup>C NMR Spectra-----S2

[1]  $^1\text{H}$  and  $^{13}\text{C}$  NMR Spectra.

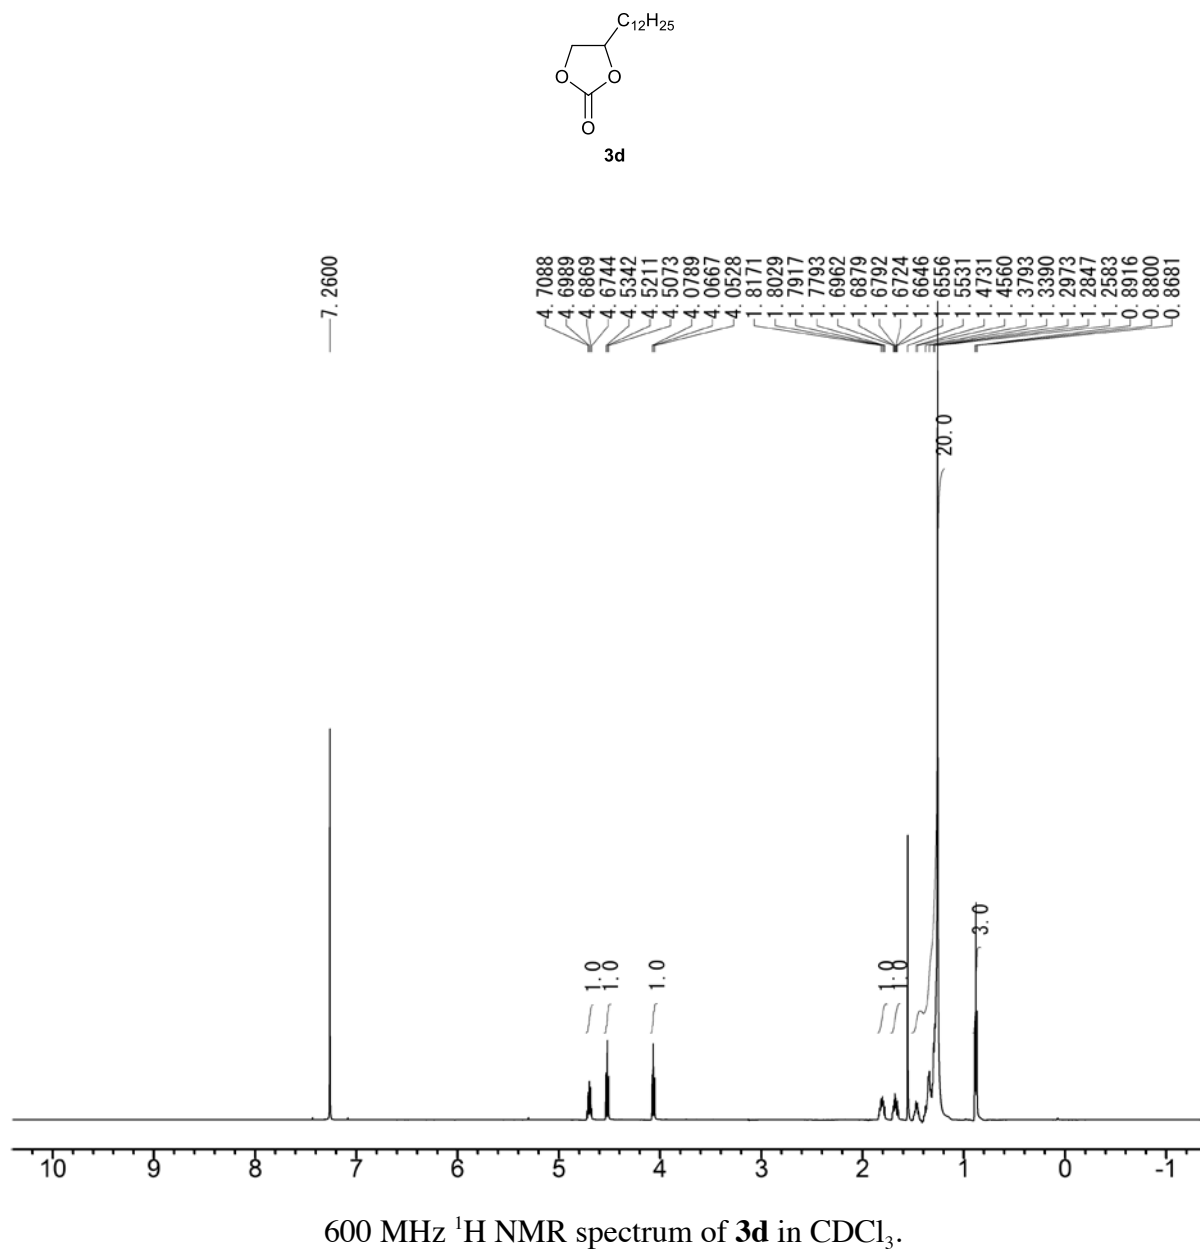

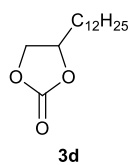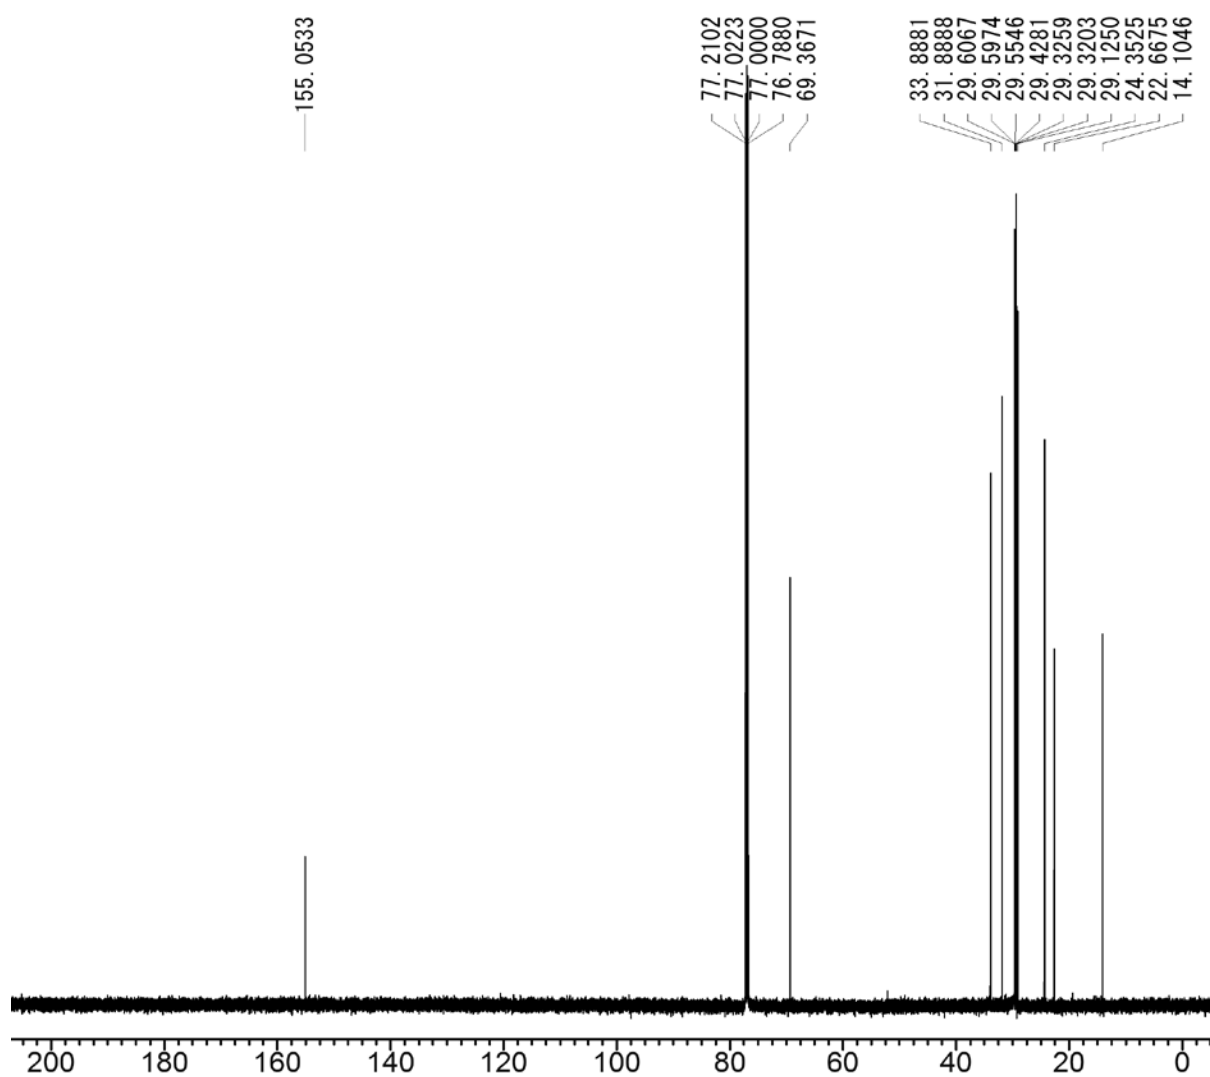

150 MHz  $^{13}\text{C}$  NMR spectrum of **3d** in  $\text{CDCl}_3$ .

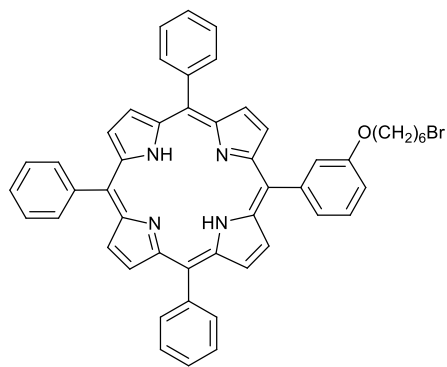

**5a**

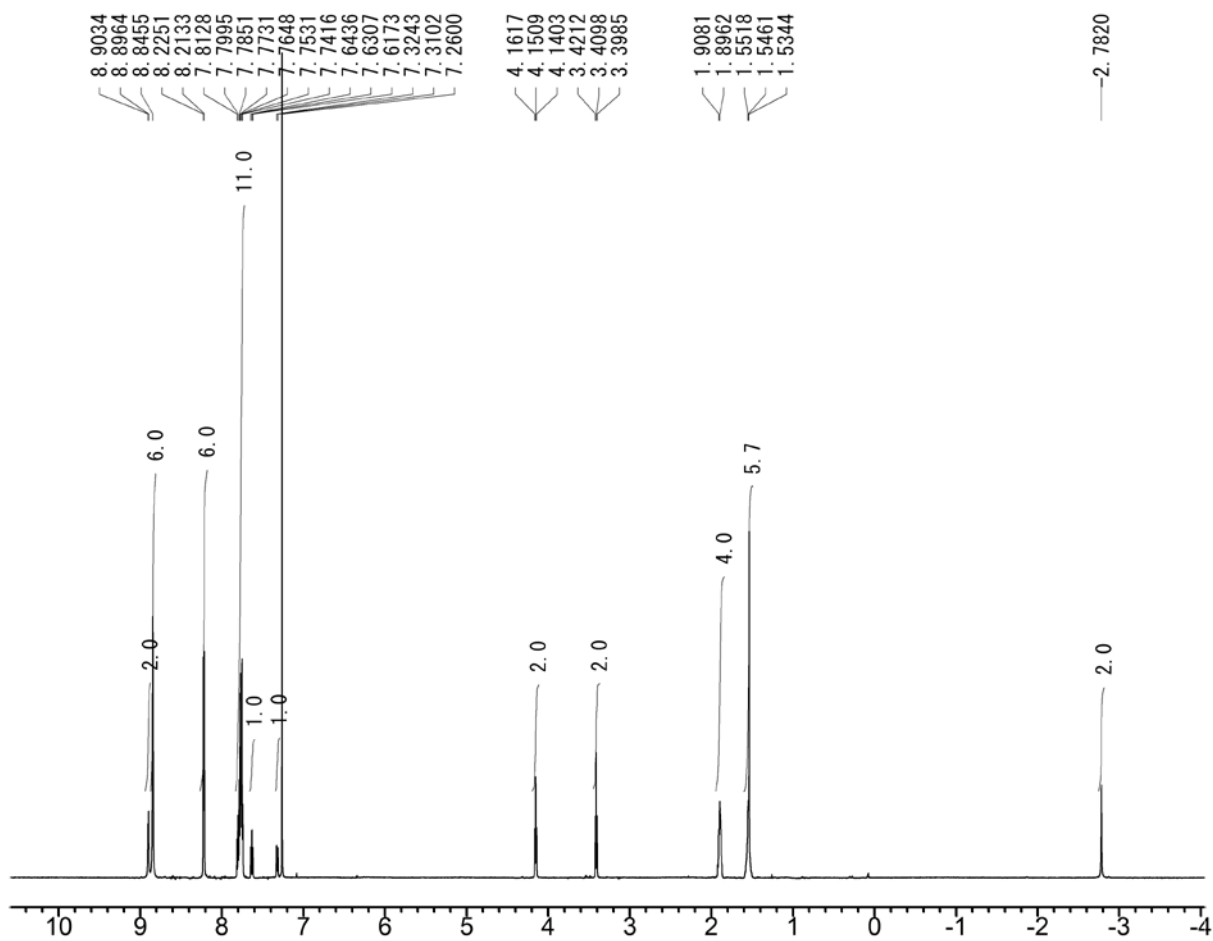

600 MHz <sup>1</sup>H NMR spectrum of **5a** in CDCl<sub>3</sub>.

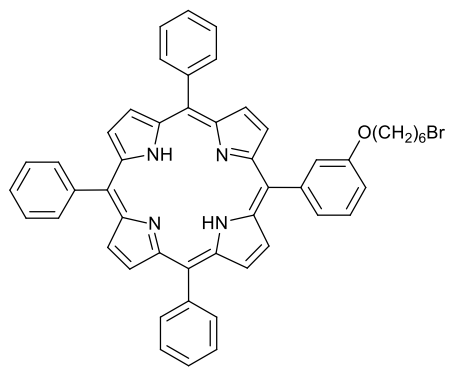

**5a**

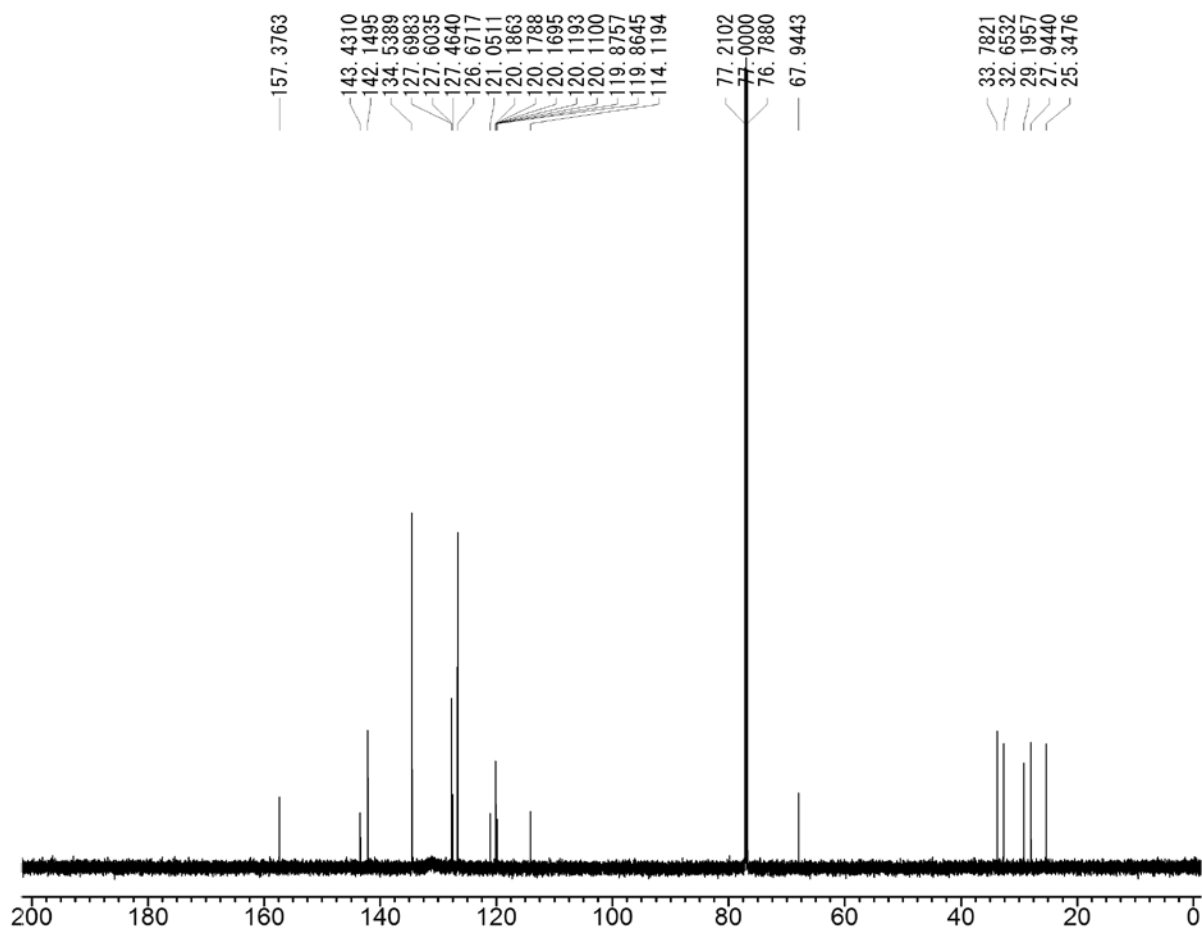

150 MHz  $^{13}\text{C}$  NMR spectrum of **5a** in  $\text{CDCl}_3$ .

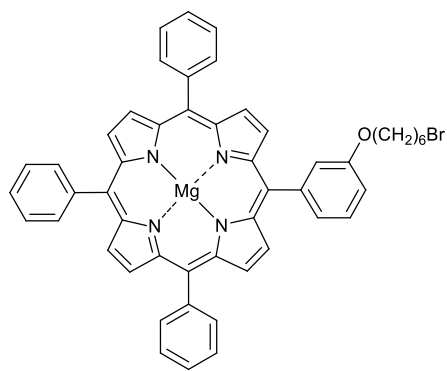

6a

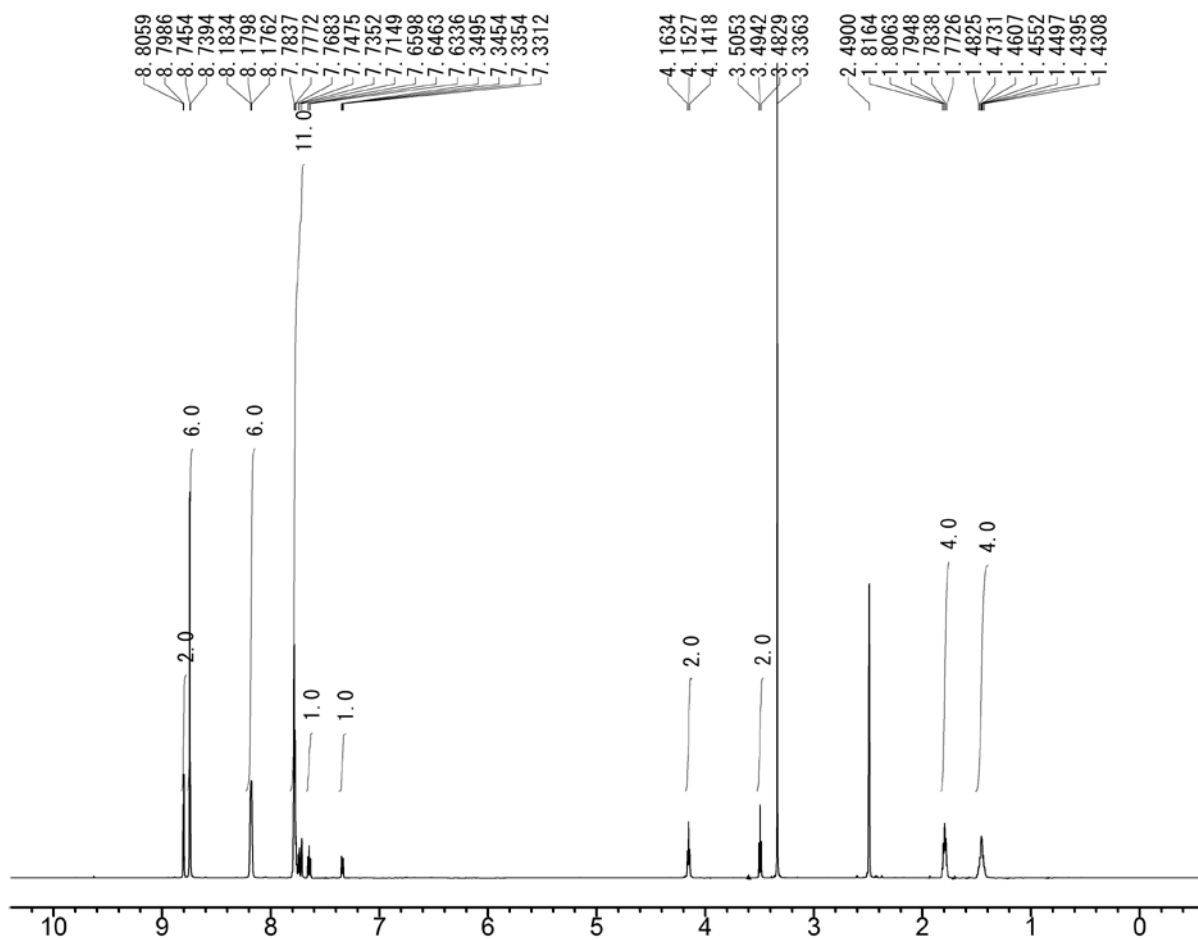

600 MHz  $^1\text{H}$  NMR spectrum of **6a** in  $d_6$ -DMSO.

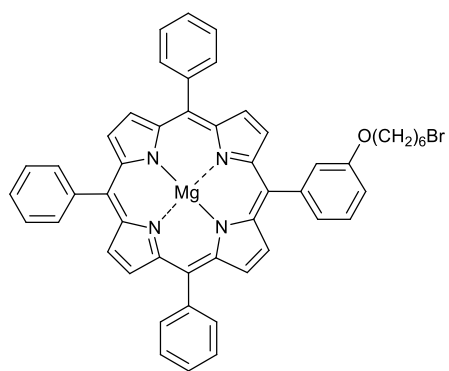

6a

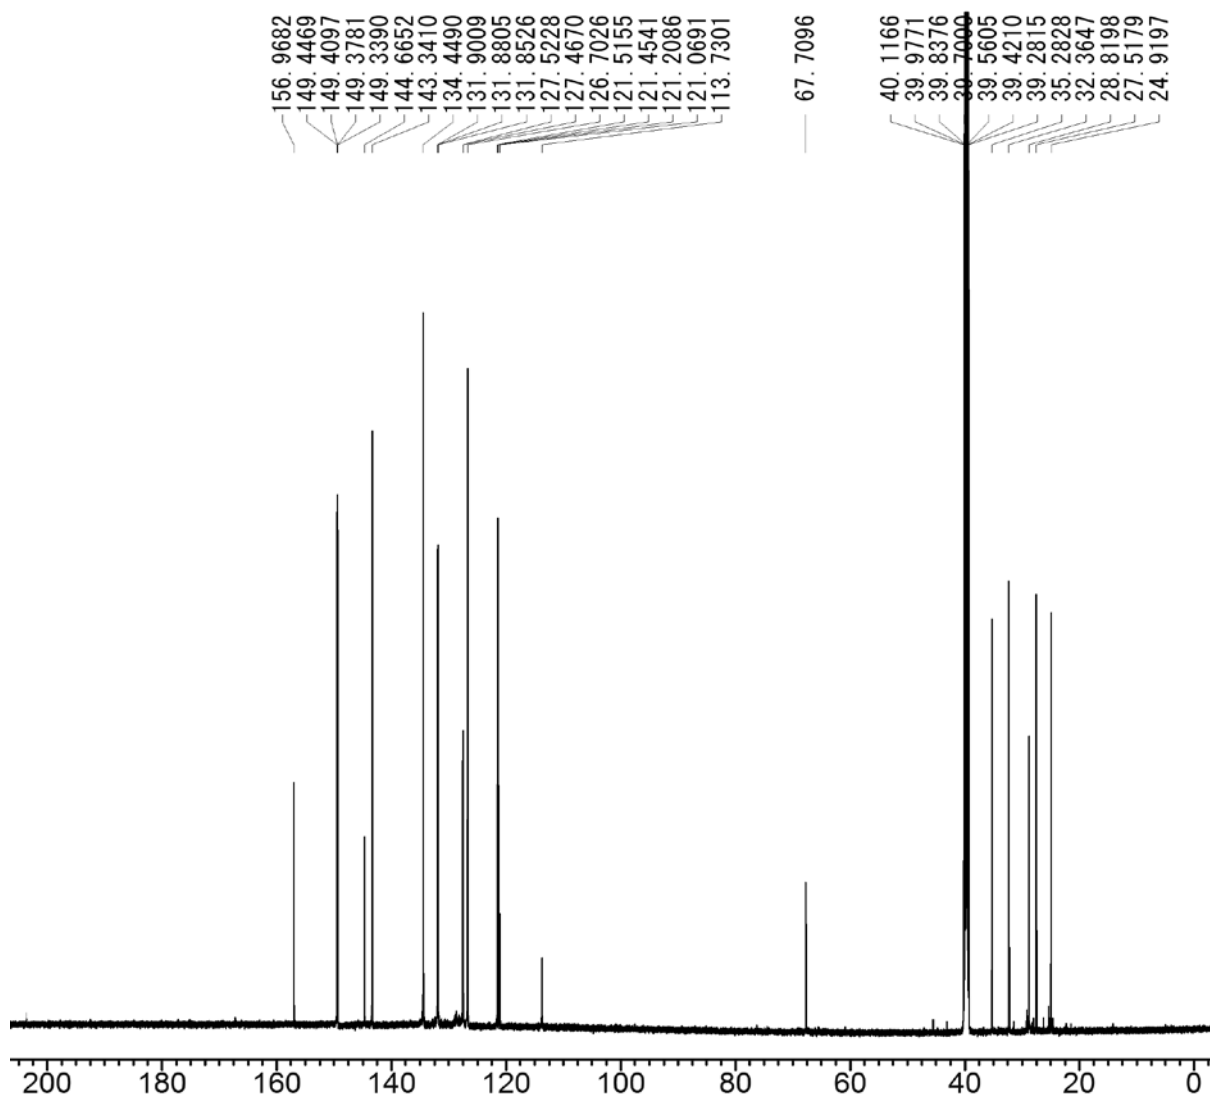

150 MHz  $^{13}\text{C}$  NMR spectrum of **6a** in  $d_6$ -DMSO.

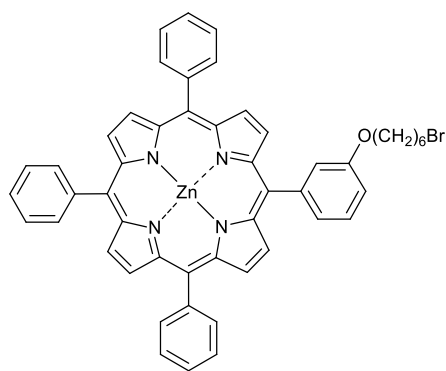

**6b**

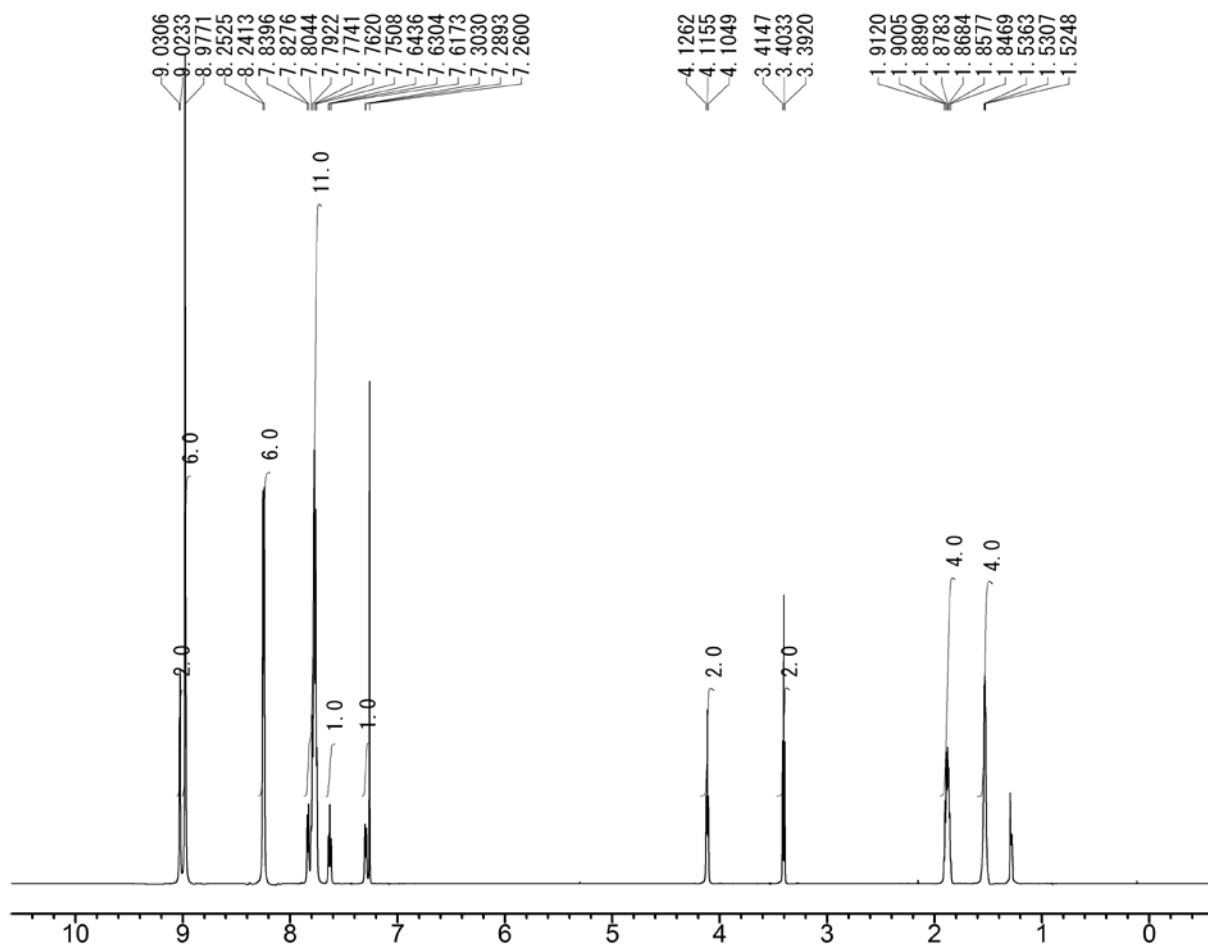

600 MHz  $^1\text{H}$  NMR spectrum of **6b** in  $\text{CDCl}_3$ .



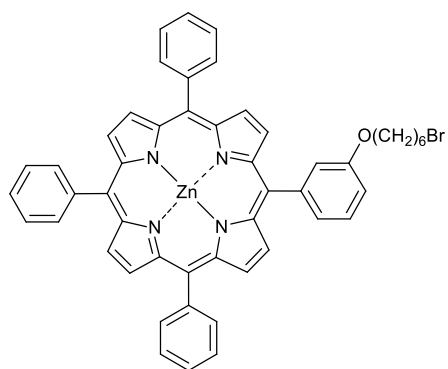

**6b**

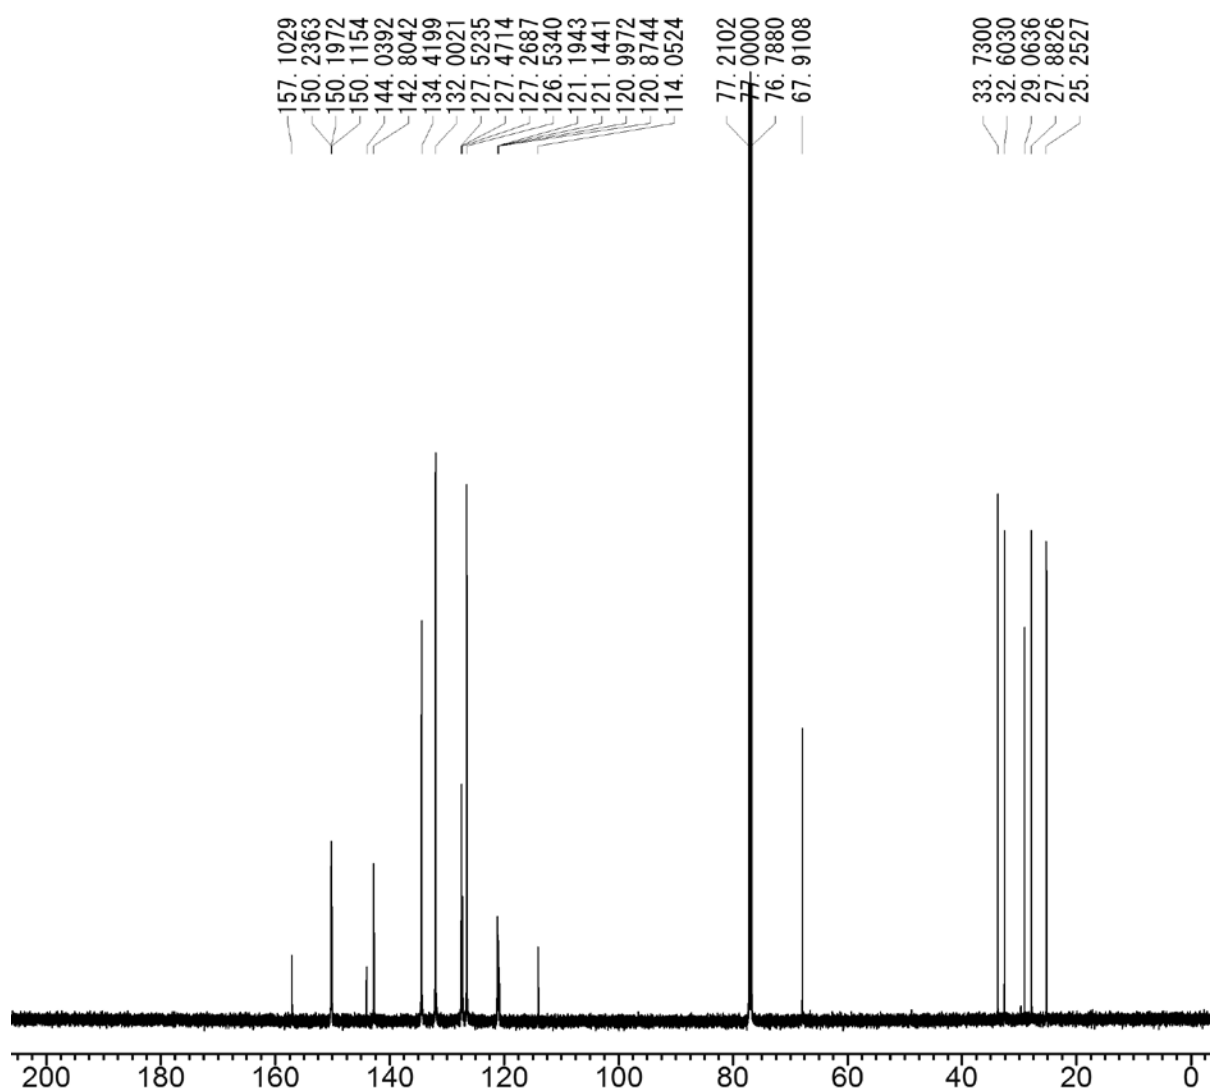

150 MHz  $^{13}\text{C}$  NMR spectrum of **6b** in  $\text{CDCl}_3$ .
